# Supplementary material for: Supplementing with L-Tryptophan Increases Medium Protein and Alters Expression of Genes and Proteins Involved in Milk Protein Synthesis and Energy Metabolism in Bovine Mammary Cells
Source: PubMed Central journal article supplement (PMC7963161; doi:10.3390/ijms22052751), 2021-03-09
Supplement: ijms-22-02751-s001.pdf [file ijms-22-02751-s001.pdf]

## Supplementary Material

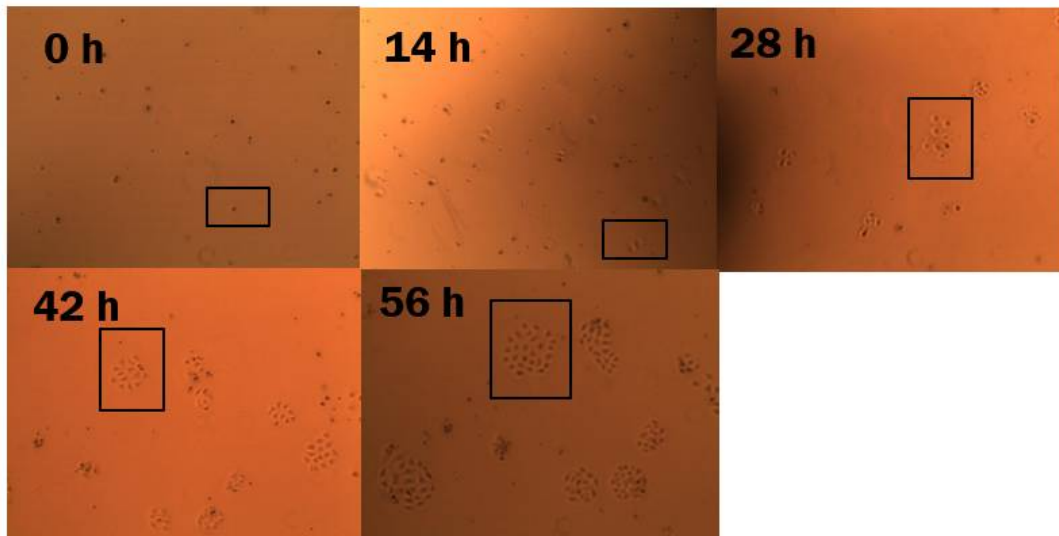

| Time after seeding | 0 h | 14 h | 28 h | 42 h | 56 h | Division Times | Doubling Time |
|--------------------|-----|------|------|------|------|----------------|---------------|
| Cell number        | 1   | 2    | 8    | 16   | 28   | 3.75           | 14.9 h        |

Figure S1. Doubling time of MAC-T cell in 10-cm round plate supplemented with the basic growth medium at 0, 14, 28, 42 and 56 h.

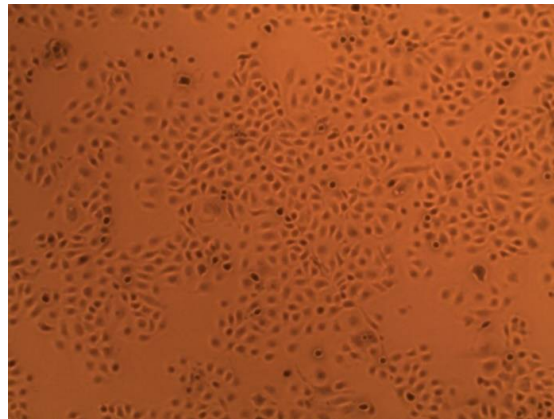

Figure S2. MAC-T cell with about 50% confluency. When the cell confluency reached about 50% confluency, considering the doubling time characteristics of our cell, the amount on time (h) wherein our cells will reach our target confluency can be estimated. For example, if our target confluency is around 90%, with a doubling time of 14.9 h, our cell will reach each confluency after 13.41 h after the cell reached confluency of 50%.

Table S1. Average relative percentage of cell protein level on MAC-T cells stimulated by L-Tryptophan supplementation.

| Concentration, mM | Incubation Time, h |       |       |       |       |
|-------------------|--------------------|-------|-------|-------|-------|
|                   | 0                  | 24    | 48    | 72    | 96    |
| 0                 | 100.0              | 206.5 | 311.6 | 324.8 | 406.7 |
| 0.3               | 100.0              | 106.2 | 181.3 | 177.3 | 172.6 |
| 0.6               | 100.0              | 101.3 | 140.6 | 135.4 | 142.4 |
| 0.9               | 100.0              | 66.3  | 92.2  | 76.4  | 91.0  |
| 1.2               | 100.0              | 119.4 | 99.2  | 78.0  | 90.8  |
| 1.5               | 100.0              | 133.3 | 98.0  | 126.9 | 113.8 |

Table S2. Average relative percentage of medium protein level on MAC-T cells stimulated by L-Tryptophan supplementation.

| Concentration, mM | Incubation Time, h |       |       |       |       |
|-------------------|--------------------|-------|-------|-------|-------|
|                   | 0                  | 24    | 48    | 72    | 96    |
| 0                 | 100.0              | 184.7 | 47.9  | 104.8 | 220.3 |
| 0.3               | 100.0              | 124.3 | 128.3 | 186.5 | 229.8 |
| 0.6               | 100.0              | 183.2 | 118.0 | 116.9 | 223.0 |
| 0.9               | 100.0              | 96.2  | 257.7 | 269.5 | 210.7 |
| 1.2               | 100.0              | 167.9 | 425.7 | 285.5 | 256.6 |
| 1.5               | 100.0              | 168.1 | 441.3 | 125.0 | 160.3 |

Table S3. Average relative percentage of total (cell and medium) protein level on MAC-T cells stimulated by L-Tryptophan supplementation.

| Concentration, mM | Incubation Time, h |       |       |       |       |
|-------------------|--------------------|-------|-------|-------|-------|
|                   | 0                  | 24    | 48    | 72    | 96    |
| 0                 | 100.0              | 214.8 | 262.9 | 294.4 | 395.0 |
| 0.3               | 100.0              | 107.2 | 168.8 | 171.0 | 179.7 |
| 0.6               | 100.0              | 114.8 | 135.9 | 140.2 | 152.8 |
| 0.9               | 100.0              | 72.5  | 127.6 | 117.0 | 116.0 |
| 1.2               | 100.0              | 127.3 | 155.8 | 113.7 | 119.3 |
| 1.5               | 100.0              | 138.1 | 155.9 | 125.9 | 121.3 |

Table S4. Statistical analysis of heterogeneity (Q) of cell protein of MAC-T cells supplemented with different dosages (0, 0.3, 0.6, 0.9, 1.2, 1.5 mM) of L-Tryptophan at 0, 24, 48, 72 and 96 h incubation time.

| Cell Protein | Possible Outlier | Gap   | Range | Q           | Confidence Interval | Critical Value | Outlier Y/N |
|--------------|------------------|-------|-------|-------------|---------------------|----------------|-------------|
| 0mM          |                  |       |       |             |                     |                |             |
| 24           | 145.3            | 88.2  | 95.5  | <b>0.92</b> | 95%                 | 0.97           | N           |
| 48           | 244.7            | 76.7  | 124.2 | <b>0.62</b> | 95%                 | 0.97           | N           |
| 72           | 399.9            | 86.0  | 139.5 | <b>0.62</b> | 95%                 | 0.97           | N           |
| 96           | 267.2            | 178.6 | 239.8 | <b>0.74</b> | 95%                 | 0.97           | N           |
| 0.3mM        |                  |       |       |             |                     |                |             |
| 24           | 118.2            | 17.6  | 18.4  | <b>0.96</b> | 95%                 | 0.97           | N           |
| 48           | 187.5            | 7.6   | 11.0  | <b>0.70</b> | 95%                 | 0.97           | N           |
| 72           | 190.7            | 17.9  | 22.5  | <b>0.80</b> | 95%                 | 0.97           | N           |
| 96           | 174.8            | 2.6   | 4.1   | <b>0.64</b> | 95%                 | 0.97           | N           |
| 0.6mM        |                  |       |       |             |                     |                |             |
| 24           | 111.7            | 11.3  | 19.8  | <b>0.57</b> | 95%                 | 0.97           | N           |
| 48           | 147.6            | 16.1  | 11.4  | <b>1.42</b> | 95%                 | 0.97           | Y           |
| 72           | 146.8            | 16.1  | 11.4  | <b>1.42</b> | 95%                 | 0.97           | Y           |
| 96           | 122.2            | 30.0  | 18.0  | <b>1.66</b> | 95%                 | 0.97           | Y           |
| 0.9mM        |                  |       |       |             |                     |                |             |
| 24           | 53.8             | 18.5  | 19.1  | <b>0.96</b> | 95%                 | 0.97           | N           |
| 48           | 98.5             | 9.2   | 9.6   | <b>0.96</b> | 95%                 | 0.97           | N           |
| 72           | 70.7             | 8.3   | 8.8   | <b>0.95</b> | 95%                 | 0.97           | N           |
| 96           | 83.3             | 10.3  | 13.0  | <b>0.79</b> | 95%                 | 0.97           | N           |
| 1.2mM        |                  |       |       |             |                     |                |             |
| 24           | 108.9            | 12.8  | 18.8  | <b>0.68</b> | 95%                 | 0.97           | N           |
| 48           | 107.9            | 12.3  | 13.7  | <b>0.90</b> | 95%                 | 0.97           | N           |
| 72           | 71.8             | 8.4   | 10.3  | <b>0.82</b> | 95%                 | 0.97           | N           |
| 96           | 94.8             | 5.1   | 6.9   | <b>0.73</b> | 95%                 | 0.97           | N           |
| 1.5mM        |                  |       |       |             |                     |                |             |
| 24           | 148.1            | 18.0  | 26.4  | <b>0.68</b> | 95%                 | 0.97           | N           |
| 48           | 110.3            | 16.1  | 20.8  | <b>0.78</b> | 95%                 | 0.97           | N           |
| 72           | 85.8             | 45.1  | 78.2  | <b>0.58</b> | 95%                 | 0.97           | N           |
| 96           | 118.8            | 5.3   | 9.8   | <b>0.54</b> | 95%                 | 0.97           | N           |

Table S5. Statistical analysis of heterogeneity (Q) of medium protein of MAC-T cells supplemented with different dosages (0.3, 0.6, 0.9, 1.2, 1.5 mM) of L-Tryptophan at 0, 24, 48, 72 and 96 h incubation time.

| Medium Protein | Possible Outlier | Gap   | Range | Q           | Confidence Interval | Critical Value | Outlier Y/N |
|----------------|------------------|-------|-------|-------------|---------------------|----------------|-------------|
| 0.3mM          |                  |       |       |             |                     |                |             |
| 24             | 34.3             | 129.1 | 140.9 | <b>0.92</b> | 95%                 | 0.97           | N           |
| 48             | 149.0            | 20.7  | 41.3  | <b>0.50</b> | 95%                 | 0.97           | N           |
| 72             | 194.1            | 7.6   | 15.2  | <b>0.50</b> | 95%                 | 0.97           | N           |
| 96             | 260.3            | 15.2  | 59.4  | <b>0.26</b> | 95%                 | 0.97           | N           |
| 0.6mM          |                  |       |       |             |                     |                |             |
| 24             | 260.2            | 77.0  | 154.0 | <b>0.50</b> | 95%                 | 0.97           | N           |
| 48             | 47.5             | 70.5  | 141.1 | <b>0.50</b> | 95%                 | 0.97           | N           |
| 72             | 121.2            | 4.3   | 99.1  | <b>0.04</b> | 95%                 | 0.97           | N           |
| 96             | 224.0            | 1.0   | 7.6   | <b>0.13</b> | 95%                 | 0.97           | N           |
| 0.9mM          |                  |       |       |             |                     |                |             |
| 24             | 93.4             | 3.1   | 5.6   | <b>0.55</b> | 95%                 | 0.97           | N           |
| 48             | 236.0            | 30.2  | 70.5  | <b>0.43</b> | 95%                 | 0.97           | N           |
| 72             | 251.4            | 21.5  | 97.3  | <b>0.22</b> | 95%                 | 0.97           | N           |
| 96             | 253.2            | 59.1  | 68.3  | <b>0.87</b> | 95%                 | 0.97           | N           |
| 1.2mM          |                  |       |       |             |                     |                |             |
| 24             | 109.9            | 66.5  | 107.3 | <b>0.62</b> | 95%                 | 0.97           | N           |
| 48             | 526.2            | 140.3 | 161.2 | <b>0.87</b> | 95%                 | 0.97           | N           |
| 72             | 234.2            | 61.8  | 92.1  | <b>0.67</b> | 95%                 | 0.97           | N           |
| 96             | 281.8            | 36.9  | 38.7  | <b>0.95</b> | 95%                 | 0.97           | N           |
| 1.5mM          |                  |       |       |             |                     |                |             |
| 24             | 237.3            | 91.1  | 116.7 | <b>0.78</b> | 95%                 | 0.97           | N           |
| 48             | 478.2            | 44.7  | 161.2 | <b>0.28</b> | 95%                 | 0.97           | N           |
| 72             | 138.1            | 16.2  | 92.1  | <b>0.18</b> | 95%                 | 0.97           | N           |
| 96             | 186.2            | 35.9  | 41.8  | <b>0.86</b> | 95%                 | 0.97           | N           |

Table S6. Statistical analysis of heterogeneity (Q) of total protein of MAC-T cells supplemented with different dosages (0, 0.3, 0.6, 0.9, 1.2, 1.5 mM) of L-Tryptophan at 0, 24, 48, 72 and 96 h incubation time.

| Total Protein | Possible Outlier | Gap   | Range | Q           | Confidence Interval | Critical Value | Outlier Y/N |
|---------------|------------------|-------|-------|-------------|---------------------|----------------|-------------|
| 0mM           |                  |       |       |             |                     |                |             |
| 24            | 288.1            | 96.2  | 123.9 | <b>0.78</b> | 95%                 | 0.97           | N           |
| 48            | 361.6            | 147.0 | 149.2 | <b>0.99</b> | 95%                 | 0.97           | Y           |
| 72            | 405.9            | 165.8 | 168.7 | <b>0.98</b> | 95%                 | 0.97           | Y           |
| 96            | 573.3            | 239.2 | 295.5 | <b>0.81</b> | 95%                 | 0.97           | N           |
| 0.3mM         |                  |       |       |             |                     |                |             |
| 24            | 108.7            | 0.9   | 3.6   | <b>0.26</b> | 95%                 | 0.97           | N           |
| 48            | 183.3            | 17.5  | 25.9  | <b>0.68</b> | 95%                 | 0.97           | N           |
| 72            | 189.4            | 17.2  | 38.2  | <b>0.45</b> | 95%                 | 0.97           | N           |
| 96            | 176.7            | 4.0   | 5.2   | <b>0.76</b> | 95%                 | 0.97           | N           |
| 0.6mM         |                  |       |       |             |                     |                |             |
| 24            | 93.4             | 23.7  | 40.5  | <b>0.59</b> | 95%                 | 0.97           | N           |
| 48            | 128.0            | 10.0  | 13.7  | <b>0.73</b> | 95%                 | 0.97           | N           |
| 72            | 164.1            | 35.4  | 36.1  | <b>0.98</b> | 95%                 | 0.97           | Y           |
| 96            | 133.2            | 26.8  | 31.9  | <b>0.84</b> | 95%                 | 0.97           | N           |
| 0.9mM         |                  |       |       |             |                     |                |             |
| 24            | 62.0             | 14.9  | 16.6  | <b>0.90</b> | 95%                 | 0.97           | N           |
| 48            | 136.9            | 12.2  | 15.7  | <b>0.78</b> | 95%                 | 0.97           | N           |
| 72            | 112.6            | 4.8   | 8.4   | <b>0.58</b> | 95%                 | 0.97           | N           |
| 96            | 119.9            | 5.6   | 6.0   | <b>0.94</b> | 95%                 | 0.97           | N           |
| 1.2mM         |                  |       |       |             |                     |                |             |
| 24            | 136.5            | 10.7  | 16.9  | <b>0.63</b> | 95%                 | 0.97           | N           |
| 48            | 171.5            | 20.0  | 26.9  | <b>0.74</b> | 95%                 | 0.97           | N           |
| 72            | 108.2            | 7.4   | 9.1   | <b>0.81</b> | 95%                 | 0.97           | N           |
| 96            | 124.1            | 6.6   | 8.0   | <b>0.83</b> | 95%                 | 0.97           | N           |
| 1.5mM         |                  |       |       |             |                     |                |             |
| 24            | 126.0            | 16.9  | 19.6  | <b>0.86</b> | 95%                 | 0.97           | N           |
| 48            | 167.8            | 13.5  | 22.0  | <b>0.61</b> | 95%                 | 0.97           | N           |
| 72            | 93.4             | 34.5  | 63.2  | <b>0.55</b> | 95%                 | 0.97           | N           |
| 96            | 124.4            | 3.1   | 5.0   | <b>0.61</b> | 95%                 | 0.97           | N           |

Table S7. Relative percentage of medium protein level on MAC-T cells supplemented with different levels of L-Tryptophan at 48 h incubation.

| Concentration, mM | Incubation Time, h |              |
|-------------------|--------------------|--------------|
|                   | 0                  | 48           |
| 0                 | 0.0                | 226.9        |
| 0                 | 100.0              | 221.4        |
| 0                 | 100.0              | 232.6        |
| <b>Avg</b>        | <b>100.0</b>       | <b>227.0</b> |
| <b>STD</b>        | <b>57.7</b>        | <b>5.6</b>   |
| <b>SE</b>         | <b>33.3</b>        | <b>3.2</b>   |
| 0.3               | 100.0              | 230.8        |
| 0.3               | 100.0              | 232.3        |
| 0.3               | 100.0              | 232.3        |
| <b>Avg</b>        | <b>100.0</b>       | <b>231.8</b> |
| <b>STD</b>        | <b>0.0</b>         | <b>0.9</b>   |
| <b>SE</b>         | <b>0.0</b>         | <b>0.5</b>   |
| 0.6               | 100.0              | 229.5        |
| 0.6               | 100.0              | 216.2        |
| 0.6               | 100.0              | 219.1        |
| <b>Avg</b>        | <b>100.0</b>       | <b>221.6</b> |
| <b>STD</b>        | <b>0.0</b>         | <b>7.0</b>   |
| <b>SE</b>         | <b>0.0</b>         | <b>4.0</b>   |
| 0.9               | 100.0              | 236.2        |
| 0.9               | 100.0              | 228.6        |
| 0.9               | 100.0              | 240.5        |
| <b>Avg</b>        | <b>100.0</b>       | <b>235.1</b> |
| <b>STD</b>        | <b>0.0</b>         | <b>6.0</b>   |
| <b>SE</b>         | <b>0.0</b>         | <b>3.5</b>   |
| 1.2               | 100.0              | 217.8        |
| 1.2               | 100.0              | 215.7        |
| 1.2               | 100.0              | 231.7        |
| <b>Avg</b>        | <b>100.0</b>       | <b>221.7</b> |
| <b>STD</b>        | <b>0.0</b>         | <b>8.7</b>   |
| <b>SE</b>         | <b>0.0</b>         | <b>5.0</b>   |
| 1.5               | 100.0              | 224.8        |
| 1.5               | 100.0              | 235.4        |
| 1.5               | 100.0              |              |
| <b>Avg</b>        | <b>100.0</b>       | <b>230.1</b> |
| <b>STD</b>        | <b>0.0</b>         | <b>7.5</b>   |
| <b>SE</b>         | <b>0.0</b>         | <b>4.3</b>   |

Table S8. Statistical analysis of heterogeneity (Q) of medium protein of MAC-T cells supplemented with different dosages (0, 0.3, 0.6, 0.9, 1.2, 1.5 mM) of L-Tryptophan at 48 h incubation time.

| Concentration (mM) | Possible Outlier | Gap  | Range | Q           | Confidence Interval | Critical Value | Outlier Y/N |
|--------------------|------------------|------|-------|-------------|---------------------|----------------|-------------|
| 0                  | 221.4            | 5.5  | 11.2  | <b>0.49</b> | 95%                 | 0.97           | N           |
| 0.3                | 230.8            | 1.5  | 1.5   | <b>1.00</b> | 95%                 | 0.97           | Y           |
| 0.6                | 229.5            | 10.4 | 13.3  | <b>0.78</b> | 95%                 | 0.97           | N           |
| 0.9                | 228.6            | 7.6  | 223.8 | <b>0.03</b> | 95%                 | 0.97           | N           |
| 1.2                | 231.7            | 14.0 | 16.0  | <b>0.87</b> | 95%                 | 0.97           | N           |
| 1.5                | 235.4            | 5.3  | 10.6  | <b>0.50</b> | 95%                 | 0.97           | N           |



Table S9. List of upregulated proteins in MAC-T Cell supplemented with L-Tryptophan

|    | Protein ID  | Protein Name                                                   | Score |     | %emPAI (Semi quantification) |      |
|----|-------------|----------------------------------------------------------------|-------|-----|------------------------------|------|
|    |             |                                                                | Con   | Trp | Con                          | Trp  |
| 1  | IPI00712562 | ACTN1 Alpha-actinin-1                                          |       | 514 |                              | 0.28 |
| 2  | IPI00826297 | HSPD1 60 kDa heat shock protein, mitochondrial                 |       | 280 |                              | 0.81 |
| 3  | IPI00700035 | HSPA1A Heat shock 70 kDa protein 1A                            |       | 377 |                              | 0.17 |
| 4  | IPI00702028 | TAGLN2 Transgelin-2                                            |       | 476 |                              | 1.57 |
| 5  | IPI00715354 | SFN 14-3-3 protein sigma                                       | 85    | 515 | 0.67                         | 1.78 |
| 6  | IPI00701086 | HIST1H2BD Histone H2B                                          |       | 370 |                              | 2.47 |
| 7  | IPI00838361 | HSPB1 Uncharacterized protein                                  | 66    | 284 | 0.37                         | 0.6  |
| 8  | IPI00694304 | CLU Clusterin                                                  | 38    | 268 | 0.07                         | 0.15 |
| 9  | IPI00706942 | TPI1 Triosephosphate isomerase                                 | 31    | 327 | 0.14                         | 0.95 |
| 10 | IPI00686173 | GSTP1 Glutathione S-transferase P                              | 89    | 158 | 0.16                         | 0.35 |
| 11 | IPI01002854 | LOC100337473 GJ17461-like                                      | 118   | 139 | 0.56                         | 0.95 |
| 12 | IPI00709865 | RPSA 40S ribosomal protein SA                                  |       | 90  |                              | 0.24 |
| 13 | IPI00732001 | SPTAN1 Uncharacterized protein                                 |       | 87  |                              | 0.04 |
| 14 | IPI00827006 | HIST1H1D Uncharacterized protein                               |       | 94  |                              | 0.17 |
| 15 | IPI00689850 | RPS18 40S ribosomal protein S18                                |       | 123 |                              | 0.48 |
| 16 | IPI00867349 | CAST protein                                                   |       | 73  |                              | 0.09 |
| 17 | IPI00686735 | LASP1 LIM and SH3 domain protein 1                             |       | 53  |                              | 0.13 |
| 18 | IPI00699333 | ANXA8L1 Annexin A8                                             | 51    | 77  | 0.22                         | 0.34 |
| 19 | IPI00826289 | VCL vinculin isoform 2                                         | 49    | 57  | 0.03                         | 0.1  |
| 20 | IPI00718109 | TKT Transketolase                                              | 91    | 90  | 0.11                         | 0.17 |
| 21 | IPI00691420 | TMEM109 Uncharacterized protein                                |       | 85  |                              | 0.15 |
| 22 | IPI01002058 | NME1-NME2 protein-like                                         |       | 91  |                              | 0.15 |
| 23 | IPI00694142 | MIF Macrophage migration inhibitory factor                     |       | 83  |                              | 0.32 |
| 24 | IPI00707040 | CTTN Uncharacterized protein                                   |       | 36  |                              | 0.06 |
| 25 | IPI00715044 | KRT17 Keratin, type I cytoskeletal 17                          |       | 50  |                              | 0.16 |
| 26 | IPI00691584 | RPS25 40S ribosomal protein S25                                |       | 91  |                              | 0.29 |
| 27 | IPI00693755 | S100A11 Similar to S100 calcium-binding protein A11 (Fragment) |       | 49  |                              | 0.35 |
| 28 | IPI00883375 | MTAP;PRDX3 PRDX3 protein                                       |       | 63  |                              | 0.12 |

|    |             |                                                                          |    |     |      |      |
|----|-------------|--------------------------------------------------------------------------|----|-----|------|------|
| 29 | IPI01004262 | LOC100337442 ribosomal protein L35-like                                  |    | 47  |      | 0.06 |
| 30 | IPI00694871 | TEKT5 Tektin-5                                                           |    | 37  |      | 0.07 |
| 31 | IPI00698932 | RPL29 60S ribosomal protein L29                                          |    | 39  |      | 0.23 |
| 32 | IPI00697285 | PPIA Peptidyl-prolyl cis-trans isomerase A                               |    | 37  |      | 0.22 |
| 33 | IPI00694684 | SAFB SAFB protein                                                        |    | 30  |      | 0.04 |
| 34 | IPI00696746 | HDGF Hepatoma-derived growth factor                                      |    | 36  |      | 0.14 |
| 35 | IPI00717276 | CARNS1 ATP-grasp domain containing 1                                     |    | 39  |      | 0.04 |
| 36 | IPI00712042 | RNH1 Ribonuclease/angiogenin inhibitor 1                                 |    | 36  |      | 0.08 |
| 37 | IPI00694444 |                                                                          |    | 33  |      | 0.24 |
| 38 | IPI00693931 | H2AFZ Histone H2A.Z                                                      |    | 31  |      | 0.29 |
| 39 | IPI00689632 | HIST1H2BM Histone H2B type 1-N                                           |    | 115 |      | 1.71 |
| 40 | IPI00867447 | - Uncharacterized protein                                                |    | 29  |      | 0.07 |
| 41 | IPI00694938 | SERPINH1 Serpin H1                                                       | 32 | 33  | 0.08 | 0.17 |
| 42 | IPI00700471 | KRT75 Keratin, type II cytoskeletal 75                                   |    | 27  |      | 0.06 |
| 43 | IPI00692681 | LRRC59 Leucine-rich repeat-containing protein 59                         |    | 30  |      | 0.23 |
| 44 | IPI01003460 | AHNAK2 AHNAK nucleoprotein 2                                             |    | 20  |      | 0.02 |
| 45 | IPI00905224 | C10H14orf38 hypothetical protein LOC617691                               |    | 26  |      | 0.04 |
| 46 | IPI00706784 | RBMX Uncharacterized protein                                             |    | 22  |      | 0.09 |
| 47 | IPI00698589 | PGAM1 Phosphoglycerate mutase 1                                          |    | 21  |      | 0.13 |
| 48 | IPI00843025 | HNRNPAB Uncharacterized protein                                          |    | 19  |      | 0.1  |
| 49 | IPI00904615 | LOC784502 carcinoembryonic antigen-related cell adhesion molecule 1-like |    | 15  |      | 0.05 |
| 50 | IPI00905628 | SF3B2 Uncharacterized protein                                            |    | 18  |      | 0.04 |
| 51 | IPI00716394 | PRR14L proline rich 14-like                                              |    | 16  |      | 0.02 |

Table S10. List of downregulated proteins in MAC-T Cell supplemented with L-Tryptophan.

|    | Protein ID  | Protein name                                                         | Score |     | %emPAI (Semi quantification) |      |
|----|-------------|----------------------------------------------------------------------|-------|-----|------------------------------|------|
|    |             |                                                                      | Con   | Trp | Con                          | Trp  |
| 1  | IPI01002905 | HSPD1 60 kDa heat shock protein, mitochondrial                       | 463   |     | 1.04                         |      |
| 2  | IPI00708046 | TUBB2B Tubulin beta-5 chain                                          | 645   | 247 | 1.39                         | 0.44 |
| 3  | IPI00706002 | ANXA2 Annexin A2                                                     | 322   | 257 | 0.45                         | 0.2  |
| 4  | IPI00706594 | TUBB2C Tubulin beta-2C chain                                         | 321   |     | 1.06                         |      |
| 5  | IPI00717884 | ATP5B ATP synthase subunit beta, mitochondrial                       | 336   | 129 | 0.29                         | 0.07 |
| 6  | IPI01028095 | HIST1H2BB Histone H2B                                                | 176   |     | 1.53                         |      |
| 7  | IPI00704788 | VGFB Neurosecretory protein VGFB                                     | 227   | 48  | 0.53                         | 0.24 |
| 8  | IPI00715690 | CTNNA1 Catenin alpha-1                                               | 147   | 158 | 0.08                         | 0.04 |
| 9  | IPI00696554 | HNRNPK Heterogeneous nuclear ribonucleoprotein K                     | 163   | 143 | 0.33                         | 0.15 |
| 10 | IPI00712775 | EEF1A1 Elongation factor 1-alpha 1                                   | 152   |     | 0.24                         |      |
| 11 | IPI00694107 | PFN1 Profilin-1                                                      | 163   | 107 | 0.99                         | 0.26 |
| 12 | IPI00699280 | RPSA Similar to 40S ribosomal protein SA (Fragment)                  | 133   |     | 0.76                         |      |
| 13 | IPI00971572 | FLNA filamin-A                                                       | 311   | 38  | 0.11                         | 0.03 |
| 14 | IPI00692247 | HSPA9 Stress-70 protein, mitochondrial                               | 160   | 114 | 0.16                         | 0.05 |
| 15 | IPI01004083 | LOC784131 eukaryotic translation elongation factor 1 alpha 1-like    |       | 98  |                              | 0.07 |
| 16 | IPI00788547 | PLS3 Plastin-3                                                       | 135   | 61  | 0.23                         | 0.11 |
| 17 | IPI00717376 | CKAP4 Uncharacterized protein                                        | 67    | 42  | 0.12                         | 0.06 |
| 18 | IPI00694295 | ATP5A1 ATP synthase subunit alpha, mitochondrial                     | 139   | 52  | 0.27                         | 0.06 |
| 19 | IPI00688960 | SFPQ Uncharacterized protein                                         | 50    |     | 0.05                         |      |
| 20 | IPI00695506 | LCP1 Lymphocyte cytosolic protein 1                                  | 90    |     | 0.23                         |      |
| 21 | IPI00708921 | KRT18 keratin, type I cytoskeletal 18                                | 66    |     | 0.25                         |      |
| 22 | IPI01003354 | LOC100336381 eukaryotic translation elongation factor 1 alpha 1-like | 63    |     | 0.15                         |      |
| 23 | IPI00696935 | HNRNPD Uncharacterized protein                                       | 48    |     | 0.1                          |      |
| 24 | IPI00841695 | CCT4 T-complex protein 1 subunit delta                               | 123   | 39  | 0.13                         | 0.06 |
| 25 | IPI00691963 | CALR Calreticulin                                                    | 90    | 47  | 0.16                         | 0.08 |
| 26 | IPI00698793 | EIF4A1 Eukaryotic initiation factor 4A-I                             | 84    |     | 0.26                         |      |
| 27 | IPI01001122 | SAP130 Sin3A-associated protein, 130kDa isoform 1                    | 53    |     | 0.03                         |      |
| 28 | IPI00845184 | KRT6A KRT6A protein                                                  | 70    |     | 0.06                         |      |
| 29 | IPI00707751 | EEF2 Elongation factor 2                                             | 48    | 38  | 0.12                         | 0.04 |

|    |             |                                                                               |    |    |      |      |
|----|-------------|-------------------------------------------------------------------------------|----|----|------|------|
| 30 | IPI01001319 | LOC787289 heterogeneous nuclear ribonucleoprotein A1-like                     | 34 |    | 0.11 |      |
| 31 | IPI00717685 | STIP1 Stress-induced-phosphoprotein 1                                         | 38 |    | 0.19 |      |
| 32 | IPI00712133 | FASN Fatty acid synthase                                                      | 77 |    | 0.01 |      |
| 33 | IPI00842450 | LARP4 Uncharacterized protein                                                 | 55 |    | 0.05 |      |
| 34 | IPI00706632 | EEF1G Elongation factor 1-gamma                                               | 44 |    | 0.07 |      |
| 35 | IPI00706541 | SLC25A3 Isoform B of Phosphate carrier protein, mitochondrial                 | 40 |    | 0.09 |      |
| 36 | IPI00734138 | HNRNPH1 Uncharacterized protein                                               | 34 |    | 0.07 |      |
| 37 | IPI00699956 | KPNA2 Uncharacterized protein                                                 | 35 |    | 0.06 |      |
| 38 | IPI00722271 | NUCB1 Nucleobindin-1                                                          | 25 |    | 0.07 |      |
| 39 | IPI00717000 | LOC617264 Uncharacterized protein                                             | 31 |    | 0.12 |      |
| 40 | IPI00685482 | PYGL Glycogen phosphorylase, liver form                                       | 38 |    | 0.04 |      |
| 41 | IPI00693977 | RPN2 Dolichyl-diphosphooligosaccharide--protein glycosyltransferase subunit 2 | 44 |    | 0.05 |      |
| 42 | IPI00686546 | CCT2 T-complex protein 1 subunit beta                                         | 33 |    | 0.06 |      |
| 43 | IPI00839060 | ATP1A2 Sodium/potassium-transporting ATPase subunit alpha-2                   | 33 |    | 0.03 |      |
| 44 | IPI00693645 | CLIC1 Chloride intracellular channel protein 1                                | 36 | 19 | 0.3  | 0.14 |
| 45 | IPI00714446 | GPI Glucose-6-phosphate isomerase                                             | 48 |    | 0.06 |      |
| 46 | IPI00697851 | KRT5 Keratin, type II cytoskeletal 5                                          | 32 |    | 0.06 |      |
| 47 | IPI00707101 | AHSG Alpha-2-HS-glycoprotein                                                  | 31 |    | 0.1  |      |
| 48 | IPI01003325 | SYNCRIP synaptotagmin binding, cytoplasmic RNA interacting protein isoform 1  | 29 |    | 0.06 |      |
| 49 | IPI00697691 | EPB41L2 erythrocyte membrane protein band 4.1-like 2                          | 27 |    | 0.03 |      |
| 50 | IPI00693975 | ANKRD35 Uncharacterized protein                                               | 27 |    | 0.03 |      |
| 51 | IPI00686837 | SGOL1 Shugoshin-like 1                                                        | 24 |    | 0.06 |      |
| 52 | IPI00714992 | PRKG2 cGMP-dependant type II protein kinase                                   | 25 |    | 0.04 |      |
| 53 | IPI00707814 | TCAM1 Testicular cell adhesion molecule 1 homolog                             | 23 |    | 0.06 |      |
| 54 | IPI00710895 | PGK1 Phosphoglycerate kinase 1                                                | 34 |    | 0.08 |      |
| 55 | IPI00688640 | RPL11 60S ribosomal protein L11                                               | 24 |    | 0.19 |      |
| 56 | IPI00714747 | SSFA2 Uncharacterized protein                                                 | 15 |    | 0.03 |      |
| 57 | IPI00690007 | SAE1 SUMO-activating enzyme subunit 1                                         | 19 |    | 0.1  |      |
| 58 | IPI00685510 | APP Amyloid beta (A4) protein                                                 | 17 |    | 0.05 |      |
| 59 | IPI00695732 | RPS2 40S ribosomal protein S2                                                 | 18 |    | 0.12 |      |

Table S11. Amino acid profile of lactogenic medium (mM)

|               |      |
|---------------|------|
| Arginine      | 0.70 |
| Cysteine      | 0.10 |
| Glutamine     | 2.50 |
| Glycine       | 0.25 |
| Histidine     | 0.15 |
| Isoleucine    | 0.42 |
| Leucine       | 0.45 |
| Lysine        | 0.50 |
| Methionine    | 0.12 |
| Phenylalanine | 0.22 |
| Serine        | 0.25 |
| Threonine     | 0.45 |
| Tryptophan    | 0.04 |
| Tyrosine      | 0.21 |
| Valine        | 0.45 |

Table S12. PCR cycling conditions used to analyze CSN2 expression.

| PCR cycling step   | Temperature | Time   | Cycle |
|--------------------|-------------|--------|-------|
| Initial Incubation | 95°C        | 3 min  | 1     |
| Denaturation       | 95°C        | 10 sec | 50    |
| Annealing          | 55°C        | 15 sec | 1     |
| Extension          | 72°C        | 30 sec | 1     |
